# Supplementary material for: Insights into the anticancer and anti-inflammatory activities of curcumin-loaded quercetin nanoparticles: in vitro bioassays coupled with synchrotron infrared microspectroscopy
Source: Royal Society of Chemistry journal article supplement (doi:10.1039/d4ma01202j), 2025-01-01
Supplement: d4ma01202j1.pdf [file d4ma01202j1.pdf]

*Supporting Information for:*

**Insights into the Anticancer and Anti-Inflammatory Activities of Curcumin-Loaded Quercetin Nanoparticles: In Vitro Bioassays Coupled with Synchrotron Infrared Microspectroscopy**

Suhair Sunoqrot <sup>a\*</sup>, Samah Abusulieh <sup>a</sup>, and Lina A. Dahabiyeh <sup>b</sup>

*<sup>a</sup> Department of Pharmacy, Faculty of Pharmacy, Al-Zaytoonah University of Jordan, Amman 11733, Jordan*

*<sup>b</sup> Department of Pharmaceutical Sciences, School of Pharmacy, The University of Jordan, Amman, Jordan*

**\*Corresponding Author:**

Suhair Sunoqrot, PhD  
Department of Pharmacy  
Faculty of Pharmacy  
Al-Zaytoonah University of Jordan  
Phone: +96264291511 Ext. 471  
Fax: +96264291432  
Email: [suhair.sunoqrot@zuj.edu.jo](mailto:suhair.sunoqrot@zuj.edu.jo)

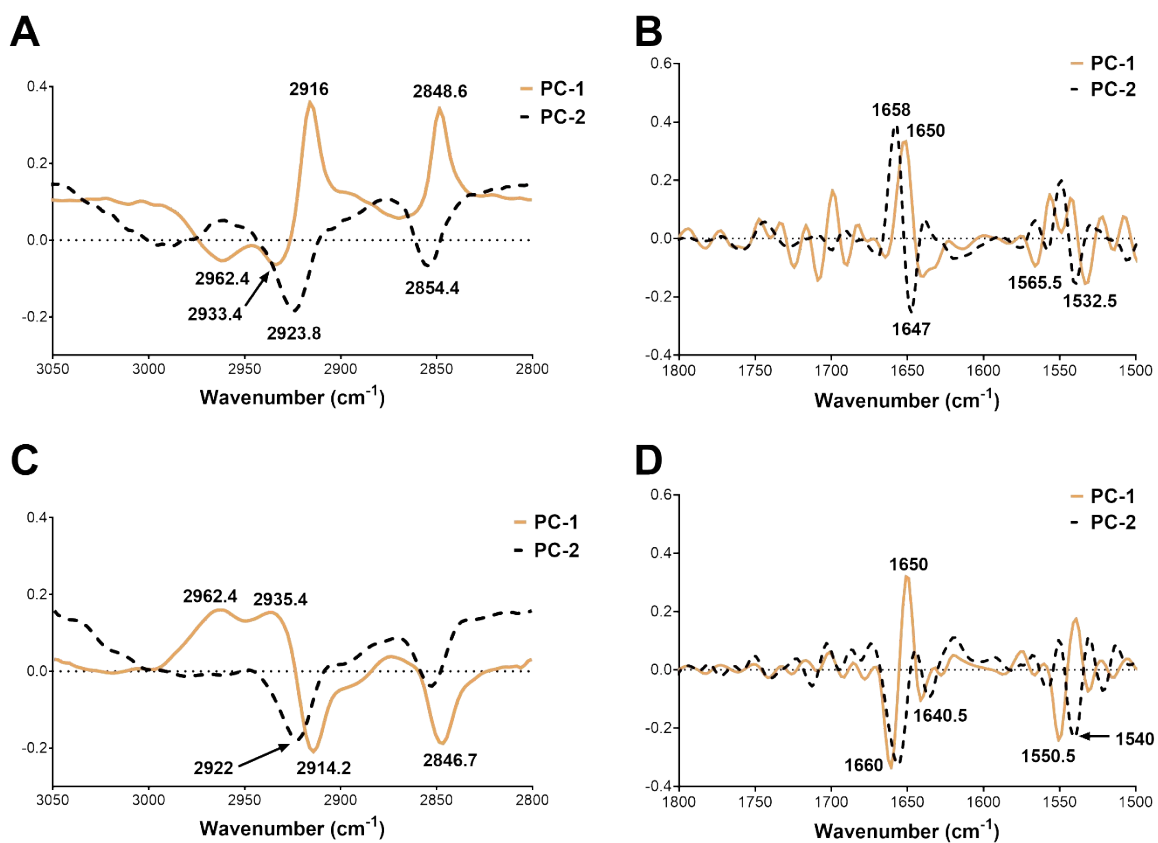

**Figure S1.** Principle component (PC)-1 and PC-2 loading plots for the (A) lipid and (B) protein-carbonyl regions in MCF-7 cells, and (C) lipid and (D) protein-carbonyl regions in RAW 264.7 macrophages.
